# Supplementary material for: Effects of Diet-Induced Weight Loss on Plasma Markers for Cholesterol Absorption and Synthesis: Secondary Analysis of a Randomized Trial in Abdominally Obese Men
Source: Nutrients. 2022 Apr 8;14(8):1546. doi: 10.3390/nu14081546 (PMC9030512; doi:10.3390/nu14081546)
Supplement: Supplementary file 1 [file nutrients-14-01546-s001.zip › nutrients-1634601-supplementary.pdf]

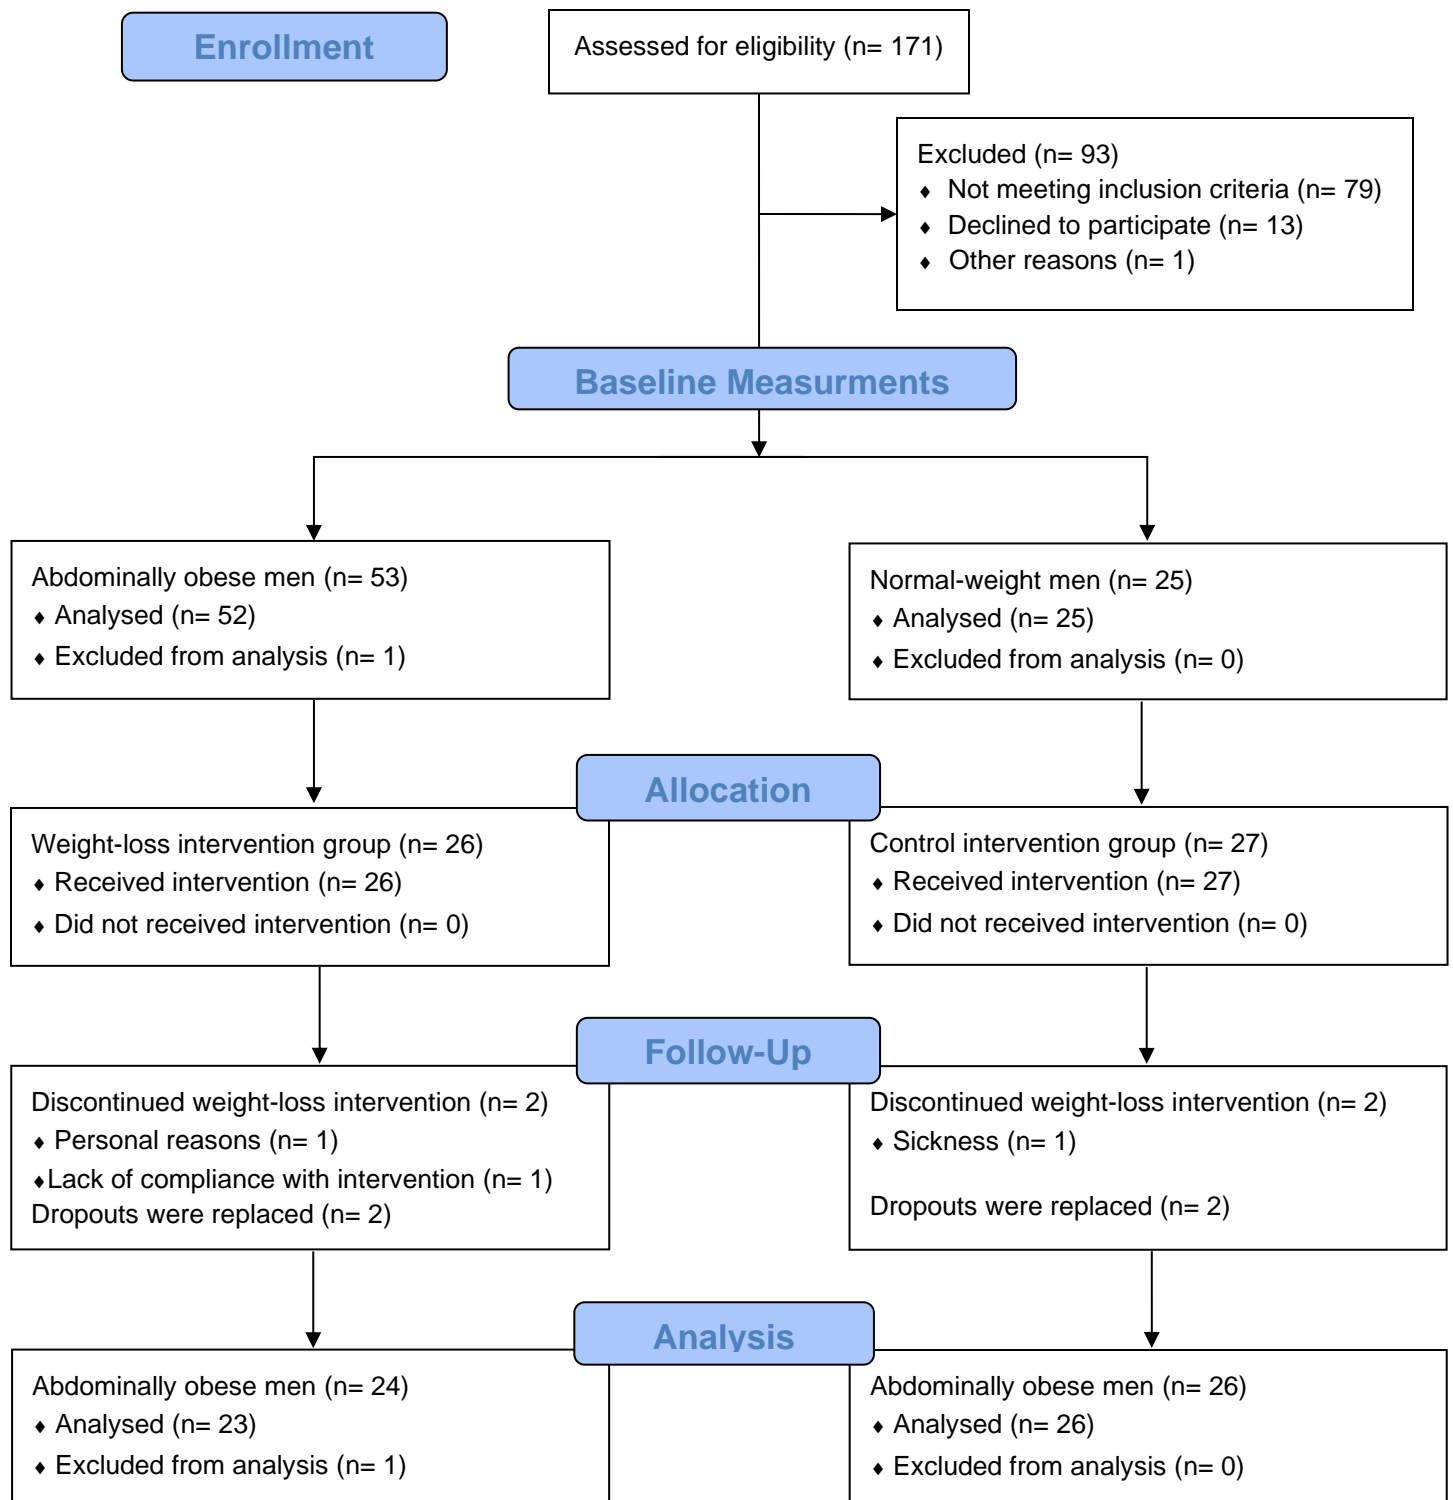

**Figure S1. Consort flow diagram of the study participation.**

**Table S1. Cross-sectional regression analyses to investigate the relations between cholesterol absorption and synthesis markers with anthropometric measures, fat distribution and IHL at baseline in all participants (n = 73).**

|                           | Cholesterol absorption |       |                  |             |       |                  |            |       |                  | Cholesterol synthesis |       |                  |
|---------------------------|------------------------|-------|------------------|-------------|-------|------------------|------------|-------|------------------|-----------------------|-------|------------------|
|                           | Cholestanol            |       |                  | Campesterol |       |                  | Sitosterol |       |                  | Lathosterol           |       |                  |
|                           | B                      | SE(B) | P                | B           | SE(B) | P                | B          | SE(B) | P                | B                     | SE(B) | P                |
| ΔBW (kg)                  | -0.007                 | 0.002 | <b>0.001</b>     | -0.018      | 0.007 | <b>0.012</b>     | -0.014     | 0.004 | <b>0.002</b>     | 0.012                 | 0.003 | <b>0.001</b>     |
| ΔBMI (kg/m <sup>2</sup> ) | -0.032                 | 0.008 | <b>&lt;0.001</b> | -0.087      | 0.024 | <b>&lt;0.001</b> | -0.064     | 0.015 | <b>&lt;0.001</b> | 0.046                 | 0.012 | <b>&lt;0.001</b> |
| ΔWaist (cm)               | -0.011                 | 0.003 | <b>&lt;0.001</b> | -0.026      | 0.008 | <b>0.002</b>     | -0.018     | 0.005 | <b>0.001</b>     | 0.015                 | 0.004 | <b>&lt;0.001</b> |
| ΔHip (cm)                 | -0.009                 | 0.004 | <b>0.047</b>     | -0.025      | 0.013 | 0.064            | -0.022     | 0.008 | <b>0.009</b>     | 0.019                 | 0.006 | <b>0.004</b>     |
| ΔWaist:Hip                | -2.000                 | 0.412 | <b>&lt;0.001</b> | -4.492      | 1.311 | <b>0.001</b>     | -2.635     | 0.862 | <b>0.003</b>     | 2.120                 | 0.655 | <b>0.002</b>     |
| ΔVF (L)                   | -0.121                 | 0.32  | <b>&lt;0.001</b> | -0.241      | 0.101 | <b>0.019</b>     | -0.181     | 0.064 | <b>0.006</b>     | 0.116                 | 0.050 | <b>0.023</b>     |
| ΔSF (L)                   | -0.069                 | 0.031 | <b>0.031</b>     | -0.242      | 0.092 | <b>0.011</b>     | -0.184     | 0.059 | <b>0.003</b>     | 0.112                 | 0.046 | <b>0.017</b>     |
| ΔIHL* (%)                 | -0.452                 | 0.152 | <b>0.004</b>     | -1.199      | 0.458 | <b>0.011</b>     | -0.873     | 0.293 | <b>0.004</b>     | 0.788                 | 0.215 | <b>&lt;0.001</b> |
